# Supplementary material for: Single-cell multiomics decodes regulatory programs for mouse secondary palate development
Source: PubMed Central journal article supplement (PMC10821874; doi:10.1038/s41467-024-45199-x), 2024-01-27
Supplement: 41467_2024_45199_MOESM3_ESM.pdf [file 41467_2024_45199_MOESM3_ESM.pdf]

**Supplementary Data 1 Gene regulatory networks predicted by Celloracle for anterior and posterior trajectories.** The `get_links` function in the Celloracle package is employed for predicting the gene regulatory network, utilizing the "bagging\_ridge" modeling method with a bagging number set to 20. The excel table lists each pair of predicted TF and target gene and their coefficient and p-values.
